# Supplementary material for: Insoluble lipid film mediates transfer of soluble saccharides from the sea to the atmosphere: the role of hydrogen bonding
Source: Copernicus journal article supplement (doi:10.5194/acp-23-2235-2023), 2023-02-15
Supplement: Supplementary file 1 [file acp-23-2235-2023-supplement.pdf]

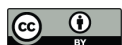

*Supplement of*

## **Insoluble lipid film mediates transfer of soluble saccharides from the sea to the atmosphere: the role of hydrogen bonding**

**Minglan Xu et al.**

*Correspondence to:* Lin Du ([lindu@sdu.edu.cn](mailto:lindu@sdu.edu.cn))

The copyright of individual parts of the supplement might differ from the article licence.

9 Table S1. Experimental results of SSA production.

| Exp. # | Materials         | Total number concentration (# cm <sup>-3</sup> ) | Mean (# cm <sup>-3</sup> ) | Total mass concentration (μg m <sup>-3</sup> ) | Mean (μg m <sup>-3</sup> ) | Geometric mean diameter (nm) | Mean (nm) |
|--------|-------------------|--------------------------------------------------|----------------------------|------------------------------------------------|----------------------------|------------------------------|-----------|
| 1      | SW                | 1.76×10 <sup>4</sup>                             | 1.80×10 <sup>4</sup>       | 194.8                                          | 195.1                      | 148.8                        | 147.4     |
| 2      | SW                | 1.83×10 <sup>4</sup>                             |                            | 195.4                                          |                            | 146.4                        |           |
| 3      | SW                | 1.81×10 <sup>4</sup>                             |                            | 195.1                                          |                            | 146.9                        |           |
| 4      | Glu+SW            | 2.03×10 <sup>4</sup>                             | 2.08×10 <sup>4</sup>       | 255.1                                          | 253.4                      | 153.3                        | 152.5     |
| 5      | Glu+SW            | 2.09×10 <sup>4</sup>                             |                            | 256.0                                          |                            | 152.8                        |           |
| 6      | Glu+SW            | 2.11×10 <sup>4</sup>                             |                            | 249.1                                          |                            | 151.3                        |           |
| 7      | Tre+SW            | 2.67×10 <sup>4</sup>                             | 2.69×10 <sup>4</sup>       | 295.3                                          | 301.6                      | 145.1                        | 145.5     |
| 8      | Tre+SW            | 2.64×10 <sup>4</sup>                             |                            | 307.1                                          |                            | 146.3                        |           |
| 9      | Tre+SW            | 2.76×10 <sup>4</sup>                             |                            | 302.5                                          |                            | 145.2                        |           |
| 10     | SW+(MA+PA+SA)     | 1.46×10 <sup>4</sup>                             | 1.49×10 <sup>4</sup>       | 159.0                                          | 161.9                      | 144.5                        | 145.5     |
| 11     | SW+(MA+PA+SA)     | 1.48×10 <sup>4</sup>                             |                            | 162.8                                          |                            | 147.3                        |           |
| 12     | SW+(MA+PA+SA)     | 1.53×10 <sup>4</sup>                             |                            | 163.8                                          |                            | 144.8                        |           |
| 13     | Glu+SW+(MA+PA+SA) | 1.61×10 <sup>4</sup>                             | 1.63×10 <sup>4</sup>       | 176.8                                          | 173.1                      | 144.0                        | 145.3     |
| 14     | Glu+SW+(MA+PA+SA) | 1.63×10 <sup>4</sup>                             |                            | 167.1                                          |                            | 145.0                        |           |
| 15     | Glu+SW+(MA+PA+SA) | 1.66×10 <sup>4</sup>                             |                            | 175.4                                          |                            | 146.9                        |           |
| 16     | Tre+SW+(MA+PA+SA) | 1.33×10 <sup>4</sup>                             | 1.36×10 <sup>4</sup>       | 146.5                                          | 153.1                      | 147.6                        | 148.3     |
| 17     | Tre+SW+(MA+PA+SA) | 1.38×10 <sup>4</sup>                             |                            | 152.9                                          |                            | 149.5                        |           |
| 18     | Tre+SW+(MA+PA+SA) | 1.37×10 <sup>4</sup>                             |                            | 159.8                                          |                            | 147.8                        |           |

10

11

12 Table S2. The wavenumbers, reflectance-absorbance intensities, peak areas and full  
 13 width at half maximum (FWHM, cm<sup>-1</sup>) values of each fitted peak in the region of  
 14 3000–2800 cm<sup>-1</sup>.

| Subphase solution              | Vibrational Mode        | Center λ | RA Int.     | Area     | FWHM     |
|--------------------------------|-------------------------|----------|-------------|----------|----------|
| SW                             | $\nu_{as}(\text{CH}_2)$ | 2918.5   | -0.00185    | -0.03309 | 16.808   |
|                                | $\nu_s(\text{CH}_2)$    | 2851.2   | -0.00111    | -0.01608 | 13.57594 |
| 0.1 g L <sup>-1</sup> Glu + SW | $\nu_{as}(\text{CH}_3)$ | 2958.4   | -4.31864E-4 | -0.00346 | 7.51782  |
|                                | $\nu_{as}(\text{CH}_2)$ | 2918.9   | -0.00171    | -0.02182 | 11.99799 |
|                                | $\nu_s(\text{CH}_2)$    | 2850.9   | -9.72011E-4 | -0.01068 | 10.32428 |
| 0.5 g L <sup>-1</sup> Glu + SW | $\nu_{as}(\text{CH}_3)$ | 2956.0   | -2.29947E-4 | -0.0026  | 10.61544 |
|                                | $\nu_{as}(\text{CH}_2)$ | 2918.6   | -0.00201    | -0.03608 | 16.87062 |
|                                | $\nu_s(\text{CH}_2)$    | 2849.5   | -0.00153    | -0.02432 | 14.91072 |
| 1.0 g L <sup>-1</sup> Glu + SW | $\nu_{as}(\text{CH}_3)$ | 2959.5   | -4.19718E-4 | -0.0052  | 11.62956 |
|                                | $\nu_{as}(\text{CH}_2)$ | 2918.3   | -0.00215    | -0.03736 | 16.29126 |
|                                | $\nu_s(\text{CH}_3)$    | 2885.6   | -2.82189E-4 | -0.00221 | 7.37158  |
|                                | $\nu_s(\text{CH}_2)$    | 2850.1   | -0.00134    | -0.01984 | 13.88958 |

|                                |                                |        |             |             |          |
|--------------------------------|--------------------------------|--------|-------------|-------------|----------|
| 2.0 g L <sup>-1</sup> Glu + SW | $\nu_{\text{as}}(\text{CH}_3)$ | 2954.4 | -2.05472E-4 | -0.00168    | 7.69794  |
|                                | $\nu_{\text{as}}(\text{CH}_2)$ | 2918.5 | -0.00213    | -0.04015    | 17.74608 |
|                                | $\nu_{\text{s}}(\text{CH}_3)$  | 2878.3 | -1.1778E-4  | -6.89695E-4 | 5.50113  |
|                                | $\nu_{\text{s}}(\text{CH}_2)$  | 2850.2 | -0.00120    | -0.02324    | 18.2208  |
| 5.0 g L <sup>-1</sup> Glu + SW | $\nu_{\text{as}}(\text{CH}_3)$ | 2963.5 | -5.64995E-4 | -0.00703    | 11.69719 |
|                                | $\nu_{\text{as}}(\text{CH}_2)$ | 2916.2 | -0.00203    | -0.02984    | 13.82432 |
|                                | $\nu_{\text{s}}(\text{CH}_3)$  | 2878.2 | -1.3869E-4  | -0.00106    | 7.19615  |
|                                | $\nu_{\text{s}}(\text{CH}_2)$  | 2851.3 | -0.00111    | -0.01218    | 10.32791 |
| 0.1 g L <sup>-1</sup> Tre + SW | $\nu_{\text{as}}(\text{CH}_3)$ | 2958.5 | -2.00472E-4 | -0.00167    | 7.83866  |
|                                | $\nu_{\text{as}}(\text{CH}_2)$ | 2918.1 | -0.00152    | -0.02744    | 17.00659 |
|                                | $\nu_{\text{s}}(\text{CH}_3)$  | 2886.7 | -2.68355E-4 | -0.00158    | 5.54736  |
|                                | $\nu_{\text{s}}(\text{CH}_2)$  | 2848.6 | -9.85504E-4 | -0.01801    | 17.16883 |
| 0.5 g L <sup>-1</sup> Tre + SW | $\nu_{\text{as}}(\text{CH}_3)$ | 2970.2 | -3.67837E-4 | -0.00554    | 14.15997 |
|                                | $\nu_{\text{as}}(\text{CH}_2)$ | 2917.6 | -0.00194    | -0.03321    | 16.06815 |
|                                | $\nu_{\text{s}}(\text{CH}_3)$  | 2884.0 | -3.72886E-4 | -0.00371    | 9.33563  |
|                                | $\nu_{\text{s}}(\text{CH}_2)$  | 2849.6 | -0.00127    | -0.02004    | 14.82763 |
| 1.0 g L <sup>-1</sup> Tre + SW | $\nu_{\text{as}}(\text{CH}_3)$ | 2954.8 | -3.27869E-4 | -0.00278    | 7.96068  |
|                                | $\nu_{\text{as}}(\text{CH}_2)$ | 2917.7 | -0.00183    | -0.03066    | 15.75973 |
|                                | $\nu_{\text{s}}(\text{CH}_3)$  | 2875.4 | -2.02348E-4 | -9.25882E-4 | 4.29858  |
|                                | $\nu_{\text{s}}(\text{CH}_2)$  | 2850.8 | -8.58981E-4 | -0.01064    | 11.64005 |
| 2.0 g L <sup>-1</sup> Tre + SW | $\nu_{\text{as}}(\text{CH}_3)$ | 2959.4 | -4.53922E-4 | -0.00561    | 11.60698 |
|                                | $\nu_{\text{as}}(\text{CH}_2)$ | 2917.7 | -0.00213    | -0.03439    | 15.18866 |
|                                | $\nu_{\text{s}}(\text{CH}_3)$  | 2879.7 | -1.53721E-4 | -0.00187    | 11.41895 |
|                                | $\nu_{\text{s}}(\text{CH}_2)$  | 2850.6 | -0.00136    | -0.02186    | 15.10103 |
| 5.0 g L <sup>-1</sup> Tre + SW | $\nu_{\text{as}}(\text{CH}_3)$ | 2958.8 | -2.48494E-4 | -0.00232    | 8.76669  |
|                                | $\nu_{\text{as}}(\text{CH}_2)$ | 2917.7 | -0.00237    | -0.04167    | 16.50295 |
|                                | $\nu_{\text{s}}(\text{CH}_2)$  | 2848.4 | -0.00159    | -0.02564    | 15.14432 |

15

16 Table S3. The wavenumbers, reflectance-absorbance intensities, peak areas and full  
17 width at half maximum (FWHM, cm<sup>-1</sup>) values of each fitted peak in the region of  
18 1800–1300 cm<sup>-1</sup>.

| Subphase solution              | Vibrational Mode                     | Center $\lambda$ | RA Int.     | Area     | FWHM     |
|--------------------------------|--------------------------------------|------------------|-------------|----------|----------|
| SW                             | $\nu(\text{C}=\text{O})_1$           | 1733.7           | -0.00116    | -0.01125 | 9.14501  |
|                                | $\nu(\text{C}=\text{O})_2$           | 1724.6           | -5.48813E-4 | -0.00446 | 7.6382   |
|                                | $\nu(\text{C}=\text{O})_3$           | 1707.8           | -4.34352E-4 | -0.00289 | 6.2493   |
|                                | $\delta(\text{H}-\text{O}-\text{H})$ | 1679.5           | 0.00119     | 0.01723  | 13.62018 |
|                                | $\nu_{\text{as}}(\text{COO}^-)_1$    | 1563.7           | -0.0061     | -0.23525 | 36.21625 |
|                                | $\nu_{\text{as}}(\text{COO}^-)_2$    | 1539.0           | -0.00209    | -0.0454  | 20.38112 |
|                                | $\delta(\text{CH}_2)$                | 1468.4           | -0.00193    | -0.02351 | 11.43217 |
|                                | $\nu_{\text{s}}(\text{COO}^-)$       | 1415.4           | -0.00104    | -0.0183  | 16.47793 |
| 0.1 g L <sup>-1</sup> Glu + SW | $\nu(\text{C}=\text{O})_1$           | 1732.8           | -0.00119    | -0.01412 | 11.15153 |

|                                |                                   |        |             |          |          |
|--------------------------------|-----------------------------------|--------|-------------|----------|----------|
|                                | $\nu(\text{C=O})_2$               | 1718.8 | -0.00154    | -0.01807 | 11.05338 |
|                                | $\nu(\text{C=O})_3$               | 1704.2 | -5.93786E-4 | -0.00495 | 7.83349  |
|                                | $\delta(\text{H-O-H})$            | 1673.0 | 0.00146     | 0.0272   | 17.4585  |
|                                | $\nu_{\text{as}}(\text{COO}^-)_1$ | 1564.2 | -0.00572    | -0.18341 | 30.10244 |
|                                | $\nu_{\text{as}}(\text{COO}^-)_2$ | 1544.2 | -0.00216    | -0.01935 | 8.43057  |
|                                | $\nu_{\text{as}}(\text{COO}^-)_3$ | 1527.8 | -0.00126    | -0.01231 | 9.19952  |
|                                | $\delta(\text{CH}_2)$             | 1468.5 | -0.00229    | -0.03705 | 15.18894 |
|                                | $\nu_{\text{s}}(\text{COO}^-)$    | 1419.2 | -7.39415E-4 | -0.00712 | 9.04681  |
| 0.5 g L <sup>-1</sup> Glu + SW | $\nu(\text{C=O})_1$               | 1742.5 | -0.00118    | -0.00813 | 6.49399  |
|                                | $\nu(\text{C=O})_2$               | 1724.3 | -9.52824E-4 | -0.01023 | 10.08979 |
|                                | $\nu(\text{C=O})_3$               | 1709.3 | -0.00227    | -0.02795 | 11.57697 |
|                                | $\delta(\text{H-O-H})$            | 1698.0 | 8.89955E-4  | 0.01806  | 19.05901 |
|                                | $\nu_{\text{as}}(\text{COO}^-)_1$ | 1567.0 | -0.00422    | -0.0867  | 19.30369 |
|                                | $\nu_{\text{as}}(\text{COO}^-)_2$ | 1544.3 | -0.00371    | -0.0907  | 22.98149 |
|                                | $\nu_{\text{as}}(\text{COO}^-)_3$ | 1523.0 | -7.76135E-4 | -0.00659 | 7.97558  |
|                                | $\delta(\text{CH}_2)$             | 1469.3 | -0.00165    | -0.01737 | 9.88728  |
|                                | $\nu_{\text{s}}(\text{COO}^-)$    | 1411.6 | -0.00104    | -0.01235 | 11.1052  |
| 1.0 g L <sup>-1</sup> Glu + SW | $\nu(\text{C=O})_1$               | 1727.2 | -0.00105    | -0.01685 | 15.12109 |
|                                | $\nu(\text{C=O})_2$               | 1708.8 | -9.93395E-4 | -0.00898 | 8.49311  |
|                                | $\delta(\text{H-O-H})$            | 1688.9 | 0.00103     | 0.01045  | 9.51712  |
|                                | $\nu_{\text{as}}(\text{COO}^-)_1$ | 1568.9 | -0.00524    | -0.14135 | 25.32749 |
|                                | $\nu_{\text{as}}(\text{COO}^-)_2$ | 1546.1 | -0.00344    | -0.06123 | 16.73342 |
|                                | $\nu_{\text{as}}(\text{COO}^-)_3$ | 1530.6 | -0.00124    | -0.01301 | 9.82577  |
|                                | $\delta(\text{CH}_2)$             | 1469.1 | -0.00158    | -0.01837 | 10.90628 |
|                                | $\nu_{\text{s}}(\text{COO}^-)$    | 1410.5 | -0.00113    | -0.02047 | 17.04823 |
| 2.0 g L <sup>-1</sup> Glu + SW | $\nu(\text{C=O})_1$               | 1722.9 | -0.00226    | -0.03437 | 14.31677 |
|                                | $\nu(\text{C=O})_2$               | 1710.5 | -0.00112    | -0.01179 | 9.93448  |
|                                | $\delta(\text{H-O-H})$            | 1685.8 | 0.00115     | 0.01126  | 9.17038  |
|                                | $\nu_{\text{as}}(\text{COO}^-)_1$ | 1572.0 | -0.00339    | -0.07563 | 20.98252 |
|                                | $\nu_{\text{as}}(\text{COO}^-)_2$ | 1550.3 | -0.00353    | -0.12405 | 33.0587  |
|                                | $\delta(\text{CH}_2)$             | 1467.3 | -0.00178    | -0.0242  | 12.76879 |
|                                | $\nu_{\text{s}}(\text{COO}^-)$    | 1402.8 | -9.6072E-4  | -0.01422 | 13.90561 |
| 5.0 g L <sup>-1</sup> Glu + SW | $\nu(\text{C=O})_1$               | 1734.3 | -0.00262    | -0.0142  | 5.0946   |
|                                | $\nu(\text{C=O})_2$               | 1720.4 | -0.00179    | -0.01514 | 7.93418  |
|                                | $\nu(\text{C=O})_3$               | 1702.2 | -0.00187    | -0.01683 | 8.47304  |
|                                | $\delta(\text{H-O-H})$            | 1664.8 | 0.00154     | 0.01781  | 10.88637 |
|                                | $\nu_{\text{as}}(\text{COO}^-)_1$ | 1565.6 | -0.00485    | -0.11179 | 21.6659  |
|                                | $\nu_{\text{as}}(\text{COO}^-)_2$ | 1546.7 | -0.00256    | -0.03503 | 12.87336 |
|                                | $\nu_{\text{as}}(\text{COO}^-)_3$ | 1523.4 | -0.0021     | -0.04584 | 20.51001 |
|                                | $\delta(\text{CH}_2)$             | 1468.9 | -0.00253    | -0.03343 | 12.42385 |
|                                | $\nu_{\text{s}}(\text{COO}^-)$    | 1408.4 | -0.00101    | -0.02691 | 25.06143 |
| 0.1 g L <sup>-1</sup> Tre + SW | $\nu(\text{C=O})_1$               | 1724.6 | -0.00237    | -0.04416 | 17.52295 |
|                                | $\nu(\text{C=O})_2$               | 1705.2 | -5.93808E-4 | -0.00421 | 6.65261  |

|                                |                                   |        |             |          |          |
|--------------------------------|-----------------------------------|--------|-------------|----------|----------|
|                                | $\delta(\text{H-O-H})$            | 1673.2 | 0.00162     | 0.02299  | 13.37156 |
|                                | $\nu_{\text{as}}(\text{COO}^-)_1$ | 1567.5 | -0.0045     | -0.08177 | 17.06647 |
|                                | $\nu_{\text{as}}(\text{COO}^-)_2$ | 1545.2 | -0.00255    | -0.03081 | 11.37012 |
|                                | $\nu_{\text{as}}(\text{COO}^-)_3$ | 1529.5 | -4.75626E-4 | -0.00544 | 10.74177 |
|                                | $\delta(\text{CH}_2)$             | 1467.7 | -0.00294    | -0.05194 | 16.59713 |
|                                | $\nu_{\text{s}}(\text{COO}^-)$    | 1404.6 | -7.2926E-4  | -0.01062 | 13.67604 |
| 0.5 g L <sup>-1</sup> Tre + SW | $\nu(\text{C=O})_1$               | 1728.7 | -0.00194    | -0.03335 | 16.18182 |
|                                | $\nu(\text{C=O})_2$               | 1693.9 | -8.97773E-4 | -0.00871 | 9.11458  |
|                                | $\delta(\text{H-O-H})$            | 1650.4 | 0.00133     | 0.0413   | 29.07776 |
|                                | $\nu_{\text{as}}(\text{COO}^-)_1$ | 1571.1 | -0.00454    | -0.10362 | 21.42142 |
|                                | $\nu_{\text{as}}(\text{COO}^-)_2$ | 1546.1 | -0.00437    | -0.10543 | 22.67422 |
|                                | $\delta(\text{CH}_2)$             | 1467.1 | -0.00157    | -0.01584 | 9.45689  |
|                                | $\nu_{\text{s}}(\text{COO}^-)$    | 1414.3 | -7.47053E-4 | -0.01205 | 15.15915 |
| 1.0 g L <sup>-1</sup> Tre + SW | $\nu(\text{C=O})_1$               | 1734.2 | -9.12388E-4 | -0.01234 | 12.70683 |
|                                | $\nu(\text{C=O})_2$               | 1715.6 | -0.00131    | -0.0322  | 23.12903 |
|                                | $\delta(\text{H-O-H})$            | 1644.2 | 6.57338E-4  | 0.01655  | 23.65629 |
|                                | $\nu_{\text{as}}(\text{COO}^-)_1$ | 1564.3 | -0.0046     | -0.11181 | 22.85851 |
|                                | $\nu_{\text{as}}(\text{COO}^-)_2$ | 1539.3 | -0.00216    | -0.05266 | 22.92928 |
|                                | $\delta(\text{CH}_2)$             | 1468.0 | -0.00158    | -0.01757 | 10.42847 |
|                                | $\nu_{\text{s}}(\text{COO}^-)$    | 1423.5 | -6.28405E-4 | -0.00762 | 11.38607 |
| 2.0 g L <sup>-1</sup> Tre + SW | $\nu(\text{C=O})_1$               | 1745.2 | -0.00113    | -0.01039 | 8.66705  |
|                                | $\nu(\text{C=O})_2$               | 1723.5 | -7.05295E-4 | -0.00912 | 12.14158 |
|                                | $\nu(\text{C=O})_3$               | 1706.9 | -0.00162    | -0.01675 | 9.71563  |
|                                | $\delta(\text{H-O-H})$            | 1680.1 | 0.0014      | 0.013    | 8.71047  |
|                                | $\nu_{\text{as}}(\text{COO}^-)_1$ | 1564.4 | -0.0065     | -0.16176 | 23.36868 |
|                                | $\nu_{\text{as}}(\text{COO}^-)_2$ | 1539.7 | -0.00525    | -0.12168 | 21.7841  |
|                                | $\nu_{\text{as}}(\text{COO}^-)_3$ | 1519.2 | -0.00335    | -0.04819 | 13.52754 |
|                                | $\delta(\text{CH}_2)$             | 1467.1 | -0.00189    | -0.02986 | 14.83903 |
|                                | $\nu_{\text{s}}(\text{COO}^-)$    | 1412.2 | -0.0012     | -0.01803 | 14.10566 |
| 5.0 g L <sup>-1</sup> Tre + SW | $\nu(\text{C=O})_1$               | 1726.6 | -0.00289    | -0.04547 | 14.77103 |
|                                | $\nu(\text{C=O})_2$               | 1707.6 | -0.00292    | -0.08951 | 28.79412 |
|                                | $\delta(\text{H-O-H})$            | 1655.7 | 0.0012      | 0.02371  | 18.58088 |
|                                | $\nu_{\text{as}}(\text{COO}^-)_1$ | 1568.3 | -0.00456    | -0.09459 | 19.4977  |
|                                | $\nu_{\text{as}}(\text{COO}^-)_2$ | 1545.7 | -0.00371    | -0.08251 | 20.90899 |
|                                | $\nu_{\text{as}}(\text{COO}^-)_3$ | 1525.9 | -0.00124    | -0.01549 | 11.73075 |
|                                | $\delta(\text{CH}_2)$             | 1467.1 | -0.00192    | -0.02074 | 10.17395 |
|                                | $\nu_{\text{s}}(\text{COO}^-)$    | 1414.3 | -0.0012     | -0.01519 | 11.91514 |

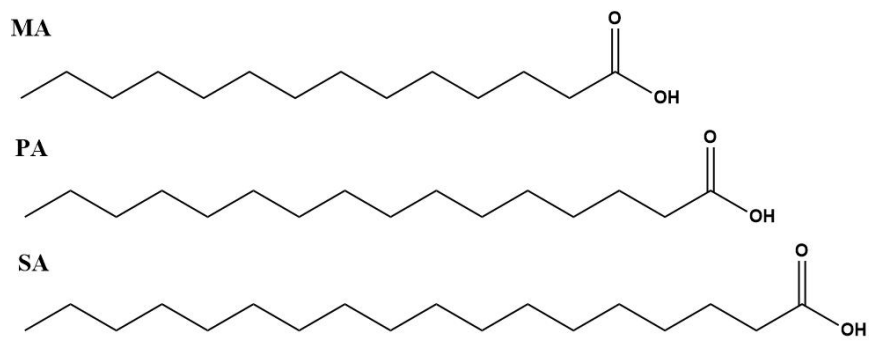

20

21 Figure S1. Chemical structures of the three fatty acids used in this study.

22

23

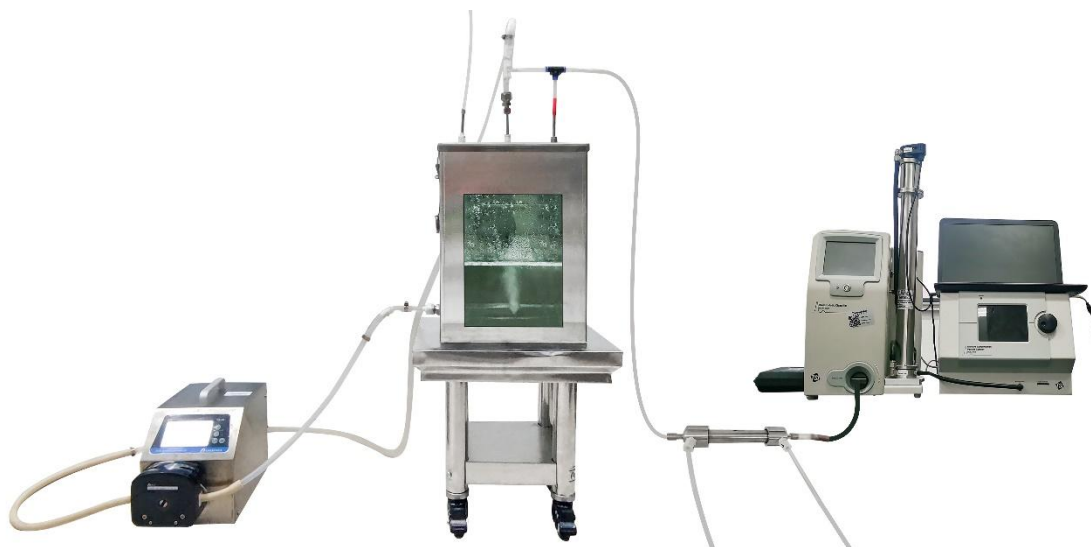

24

25 Figure S2. The physical drawing of a plunging jet-sea spray aerosol generator.

26

27

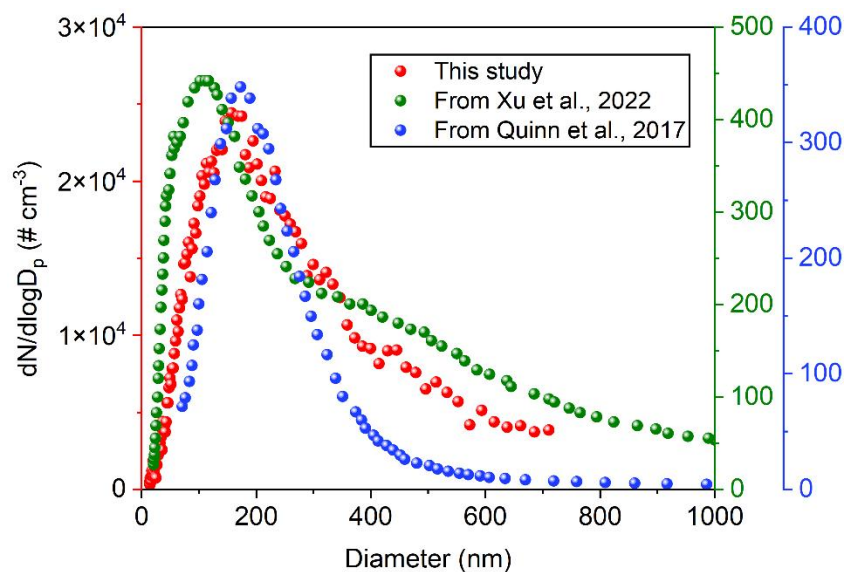

28

29 Figure S3. Comparison of particle number size distribution of SSAs generated by sea  
 30 spray aerosol generator in our study with real SSA in the field measurements.

31

32

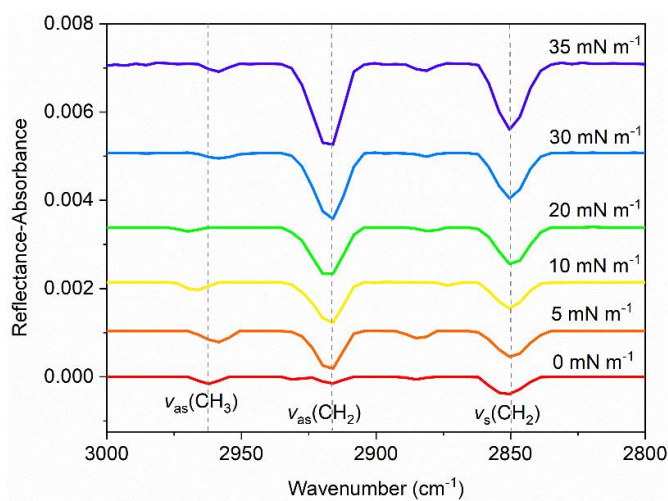

33

34 Figure S4. PM-IRRAS spectra (3000–2800  $\text{cm}^{-1}$ ) of mixed fatty acids at the  
 35 air/seawater interface at different surface pressure.

36
